# Supplementary material for: Using Capture-Recapture Methods to Estimate Influenza Hospitalization Incidence Rates
Source: bioRxiv or medRxiv preprint supplement (doi:10.1101/2020.11.03.20225482), 2021-09-10
Supplement: Supplementary file [file media-1.pdf]

## Supplemental Tables

**Table S1. Example of capture-recapture estimate**

| Research database | Clinical Database            |                              | Total            |
|-------------------|------------------------------|------------------------------|------------------|
|                   | Cases<br>Clinical test       | Cases<br>missed              |                  |
| Cases enrolled    | 284 ( <i>m</i> )             | 29 ( <i>N</i> <sub>2</sub> ) | 313 ( <i>n</i> ) |
| Cases missed      | 24 ( <i>N</i> <sub>1</sub> ) | 2 ( <i>X</i> )               |                  |
| Total             | 308 ( <i>M</i> )             |                              | 337( <i>N</i> )  |

**Table S2. Examining independence assumption for overall and sub-populations**

| Population      | Probability of capture     | Marginal Probability          |                               | Product of                | Independence            |
|-----------------|----------------------------|-------------------------------|-------------------------------|---------------------------|-------------------------|
|                 | in both databases<br>(m/N) | Clinical<br>database<br>(M/N) | Research<br>database<br>(n/N) | Marginal<br>probabilities | Condition<br>Satisfied* |
| 3-year total    | 0.84                       | 0.91                          | 0.93                          | 0.85                      | Yes                     |
| Sub-Populations |                            |                               |                               |                           |                         |
| Age group       |                            |                               |                               |                           |                         |
| 18-49 years     | 0.85                       | 0.93                          | 0.92                          | 0.85                      | Yes                     |
| 50-64 years     | 0.82                       | 0.90                          | 0.91                          | 0.83                      | Yes                     |
| 65-74 years     | 0.84                       | 0.92                          | 0.92                          | 0.85                      | Yes                     |
| 75+             | 0.87                       | 0.91                          | 0.96                          | 0.87                      | Yes                     |
| Race            |                            |                               |                               |                           |                         |
| White           | 0.85                       | 0.91                          | 0.94                          | 0.85                      | Yes                     |
| Black           | 0.83                       | 0.93                          | 0.90                          | 0.84                      | Yes                     |
| Sex             |                            |                               |                               |                           |                         |

|                    |      |      |      |      |     |
|--------------------|------|------|------|------|-----|
| Female             | 0.83 | 0.91 | 0.92 | 0.84 | Yes |
| Male               | 0.87 | 0.93 | 0.94 | 0.87 | Yes |
| Season             |      |      |      |      |     |
| 2016-2017          | 0.87 | 0.94 | 0.92 | 0.87 | Yes |
| 2017-2018          | 0.85 | 0.93 | 0.92 | 0.85 | Yes |
| 2018-2019          | 0.82 | 0.87 | 0.95 | 0.82 | Yes |
| Vaccination Status |      |      |      |      |     |
| Unvaccinated       | 0.81 | 0.91 | 0.91 | 0.82 | Yes |
| Vaccinated         | 0.87 | 0.92 | 0.94 | 0.87 | Yes |
| Prior Vaccination  |      |      |      |      |     |
| No                 | 0.85 | 0.92 | 0.92 | 0.85 | Yes |
| Yes                | 0.84 | 0.90 | 0.94 | 0.85 | Yes |

\*Independence condition: Probability of influenza positives captured by both databases is equal or nearly equal to the product of the marginal probabilities of influenza positives captured by clinical and research databases.
